# Supplementary material for: Low expression of endoplasmic reticulum stress-related gene SERP1 is associated with poor prognosis and immune infiltration in skin cutaneous melanoma
Source: publisher site journal article supplement (doi:10.18632/aging.203594), 2021-10-05
Supplement: Supplementary file [file aging-v13i19-203594-supplementary-material-SD2.pdf]

## SUPPLEMENTARY TABLES

**Supplementary Table 1. TCGA SKCM patient characteristics.**

| <b>Characteristic</b>       | <b>Levels</b>             | <b>Overall</b> |
|-----------------------------|---------------------------|----------------|
| n                           |                           | 471            |
| Gender, n (%)               | Female                    | 179 (38%)      |
|                             | Male                      | 292 (62%)      |
| Age, n (%)                  | <=60                      | 252 (54.4%)    |
|                             | >60                       | 211 (45.6%)    |
| Race, n (%)                 | Asian                     | 12 (2.6%)      |
|                             | Black or African American | 1 (0.2%)       |
| Weight, n (%)               | White                     | 448 (97.2%)    |
|                             | <=70                      | 77 (29.7%)     |
| Height, n (%)               | >70                       | 182 (70.3%)    |
|                             | < 170                     | 118 (46.5%)    |
| BMI, n (%)                  | >=170                     | 136 (53.5%)    |
|                             | <=25                      | 84 (33.5%)     |
| T stage, n (%)              | >25                       | 167 (66.5%)    |
|                             | T1                        | 41 (11.3%)     |
| N stage, n (%)              | T2                        | 79 (21.7%)     |
|                             | T3                        | 91 (25%)       |
|                             | T4                        | 153 (42%)      |
|                             | N0                        | 235 (56.8%)    |
| M stage, n (%)              | N1                        | 74 (17.9%)     |
|                             | N2                        | 49 (11.8%)     |
|                             | N3                        | 56 (13.5%)     |
| Pathologic stage, n (%)     | M0                        | 418 (94.4%)    |
|                             | M1                        | 25 (5.6%)      |
|                             | Stage I                   | 77 (18.7%)     |
|                             | Stage II                  | 140 (34%)      |
| Radiation therapy, n (%)    | Stage III                 | 171 (41.5%)    |
|                             | Stage IV                  | 24 (5.8%)      |
|                             | No                        | 383 (82.5%)    |
|                             | Yes                       | 81 (17.5%)     |
| Tumor tissue site, n (%)    | Extremities               | 197 (47%)      |
|                             | Trunk                     | 171 (40.8%)    |
|                             | Head and Neck             | 38 (9.1%)      |
|                             | Other Specify             | 13 (3.1%)      |
| Melanoma ulceration, n (%)  | No                        | 147 (46.8%)    |
|                             | Yes                       | 167 (53.2%)    |
| Melanoma Clark level, n (%) | I                         | 6 (1.9%)       |
|                             | II                        | 18 (5.6%)      |
|                             | III                       | 77 (23.9%)     |
|                             | IV                        | 168 (52.2%)    |
|                             | V                         | 53 (16.5%)     |
| Breslow depth, n (%)        | <=3                       | 185 (51.4%)    |
|                             | >3                        | 175 (48.6%)    |
| Age, median (IQR)           |                           | 58 (48, 71)    |

Abbreviations: SERP1, Stress associated endoplasmic reticulum protein 1; SKCM, Skin Cutaneous Melanoma; IQR, interquartile range. TCGA, The Cancer Genome Atlas; BMI, Body Mass Index.

**Supplementary Table 2. Top up and down 15 items of differential expressed genes of SERP1.**

| Gene_name  | Gene_id         | Gene_biotype                       | log2foldchange | lfcse    | Stat     | pvalue   | padj     |
|------------|-----------------|------------------------------------|----------------|----------|----------|----------|----------|
| UP         |                 |                                    |                |          |          |          |          |
| PASD1      | ENSG00000166049 | protein_coding                     | 69.83688       | 4.640308 | 0.487069 | 9.527005 | 1.62E-21 |
| SMR3B      | ENSG00000171201 | protein_coding                     | 3.471793       | 4.547842 | 0.97397  | 4.669388 | 3.02E-06 |
| FOXR2      | ENSG00000189299 | protein_coding                     | 16.68608       | 4.371976 | 0.446959 | 9.781607 | 1.35E-22 |
| MAEL       | ENSG00000143194 | protein_coding                     | 81.48709       | 4.281782 | 0.310803 | 13.77653 | 3.53E-43 |
| LINC00200  | ENSG00000229205 | lncRNA                             | 5.463603       | 4.215688 | 0.522708 | 8.065098 | 7.32E-16 |
| OTOR       | ENSG00000125879 | protein_coding                     | 19.10208       | 4.166952 | 0.649502 | 6.415615 | 1.40E-10 |
| CT45A1     | ENSG00000268940 | protein_coding                     | 10.08509       | 4.113013 | 0.609996 | 6.742684 | 1.55E-11 |
| AL354685.1 | ENSG00000233887 | processed_pseudogene               | 8.446124       | 4.013919 | 0.705495 | 5.68951  | 1.27E-08 |
| SLITRK1    | ENSG00000178235 | protein_coding                     | 24.69851       | 3.989265 | 0.336024 | 11.87197 | 1.66E-32 |
| LINC01203  | ENSG00000226985 | lncRNA                             | 4.358567       | 3.974891 | 0.435579 | 9.125535 | 7.14E-20 |
| SAGE1      | ENSG00000181433 | protein_coding                     | 21.23367       | 3.946295 | 0.456596 | 8.642863 | 5.48E-18 |
| AC004674.1 | ENSG00000235592 | unprocessed_pseudogene             | 1.883181       | 3.786196 | 0.706633 | 5.358079 | 8.41E-08 |
| FAR2P1     | ENSG00000180178 | transcribed_unprocessed_pseudogene | 45.99805       | 3.684811 | 0.393731 | 9.358707 | 8.07E-21 |
| BX119904.2 | ENSG00000230159 | lncRNA                             | 7.019114       | 3.550922 | 0.666204 | 5.33008  | 9.82E-08 |
| HTN3       | ENSG00000205649 | protein_coding                     | 134.4259       | 3.549214 | 0.505356 | 7.023189 | 2.17E-12 |
| DOWN       |                 |                                    |                |          |          |          |          |
| KRTDAP     | ENSG00000188508 | protein_coding                     | 924.0061       | -4.52021 | 0.380391 | -11.8831 | 1.45E-32 |
| CDSN       | ENSG00000204539 | protein_coding                     | 39.63          | -4.52433 | 0.448062 | -10.0976 | 5.66E-24 |
| KRT71      | ENSG00000139648 | protein_coding                     | 3.876285       | -4.6771  | 0.585631 | -7.98642 | 1.39E-15 |
| SPRR2E     | ENSG00000203785 | protein_coding                     | 578.3245       | -4.68414 | 0.456065 | -10.2708 | 9.54E-25 |
| LINC01527  | ENSG00000224308 | lncRNA                             | 16.24596       | -4.71413 | 0.549555 | -8.57809 | 9.65E-18 |
| SPRR2G     | ENSG00000159516 | protein_coding                     | 324.7711       | -4.73287 | 0.501736 | -9.43299 | 3.99E-21 |
| KRT1       | ENSG00000167768 | protein_coding                     | 6338.582       | -4.75016 | 0.415758 | -11.4253 | 3.13E-30 |
| KRT16      | ENSG00000186832 | protein_coding                     | 12867.72       | -4.76411 | 0.39794  | -11.9719 | 4.98E-33 |
| LCE2B      | ENSG00000159455 | protein_coding                     | 38.90983       | -4.82879 | 0.889447 | -5.42898 | 5.67E-08 |
| CALML5     | ENSG00000178372 | protein_coding                     | 926.9186       | -4.8295  | 0.495511 | -9.74649 | 1.91E-22 |
| KRT6C      | ENSG00000170465 | protein_coding                     | 5147.085       | -4.89758 | 0.474097 | -10.3303 | 5.14E-25 |
| WFDC12     | ENSG00000168703 | protein_coding                     | 54.46971       | -4.99446 | 0.514118 | -9.71461 | 2.61E-22 |
| LCE3E      | ENSG00000185966 | protein_coding                     | 63.57593       | -5.16652 | 0.631301 | -8.18393 | 2.75E-16 |
| LORICRIN   | ENSG00000203782 | protein_coding                     | 229.1628       | -5.23657 | 0.489006 | -10.7086 | 9.28E-27 |
| CASP14     | ENSG00000105141 | protein_coding                     | 734.9536       | -5.77555 | 0.459991 | -12.5558 | 3.69E-36 |

Abbreviations: SERP1, Stress associated endoplasmic reticulum protein 1.

**Supplemental Table 3. Top 50 genes most positively and negatively associated with SERP1 in SKCM patients.**

| <b>Gene_name</b>            | <b>Gene_biotype</b> | <b>cor_pearson</b> | <b>p_pearson</b> | <b>cor_spearman</b> |
|-----------------------------|---------------------|--------------------|------------------|---------------------|
| Top 50 Positive Correlation |                     |                    |                  |                     |
| SSR3                        | protein_coding      | 0.795181717        | 5.8818E-104      | 0.751330735         |
| SLC33A1                     | protein_coding      | 0.774519189        | 2.45527E-95      | 0.725364812         |
| MYNN                        | protein_coding      | 0.76345715         | 4.33617E-91      | 0.720671351         |
| ZNF639                      | protein_coding      | 0.738031334        | 3.71758E-82      | 0.719719153         |
| CNBP                        | protein_coding      | 0.752144065        | 5.57158E-87      | 0.716621838         |
| UBA5                        | protein_coding      | 0.759276657        | 1.52028E-89      | 0.711793316         |
| IQCB1                       | protein_coding      | 0.76088658         | 3.89736E-90      | 0.710512655         |
| TMEM39A                     | protein_coding      | 0.748843642        | 7.99883E-86      | 0.70747931          |
| NMD3                        | protein_coding      | 0.754461278        | 8.36847E-88      | 0.703166912         |
| MBD4                        | protein_coding      | 0.739794515        | 9.65449E-83      | 0.701720296         |
| EIF2A                       | protein_coding      | 0.767484819        | 1.31267E-92      | 0.696685854         |
| ARMC8                       | protein_coding      | 0.744213481        | 3.13408E-84      | 0.69225746          |
| ZNF148                      | protein_coding      | 0.746288972        | 6.11349E-85      | 0.68738656          |
| DCUN1D1                     | protein_coding      | 0.742596981        | 1.10715E-83      | 0.686714244         |
| PRKCI                       | protein_coding      | 0.742134798        | 1.58548E-83      | 0.683685263         |
| GTF2E1                      | protein_coding      | 0.731596843        | 4.65073E-80      | 0.682707569         |
| ZBTB11                      | protein_coding      | 0.735595434        | 2.35205E-81      | 0.682078551         |
| TBL1XR1                     | protein_coding      | 0.740030784        | 8.05204E-83      | 0.681496161         |
| ATR                         | protein_coding      | 0.741935038        | 1.85123E-83      | 0.680610459         |
| NAA50                       | protein_coding      | 0.74785842         | 1.75761E-85      | 0.679028898         |
| OSBPL11                     | protein_coding      | 0.731400519        | 5.37718E-80      | 0.674909673         |
| SELENOT                     | protein_coding      | 0.767062889        | 1.89983E-92      | 0.674804817         |
| PDCD10                      | protein_coding      | 0.747620414        | 2.12461E-85      | 0.673889944         |
| DHX36                       | protein_coding      | 0.73836159         | 2.89033E-82      | 0.672835187         |
| PIK3CA                      | protein_coding      | 0.71719975         | 1.40316E-75      | 0.670906328         |
| RASA2                       | protein_coding      | 0.721594824        | 6.45089E-77      | 0.670582919         |
| SEN5                        | protein_coding      | 0.721900751        | 5.19471E-77      | 0.665078521         |
| SEC62                       | protein_coding      | 0.725632766        | 3.61315E-78      | 0.663001854         |
| TBC1D23                     | protein_coding      | 0.722168396        | 4.29704E-77      | 0.662420267         |
| MSL2                        | protein_coding      | 0.714728218        | 7.72843E-75      | 0.661514582         |
| U2SURP                      | protein_coding      | 0.713729365        | 1.53222E-74      | 0.66061039          |
| FNDC3B                      | protein_coding      | 0.701933891        | 3.99251E-71      | 0.659742375         |
| KPNA4                       | protein_coding      | 0.72348524         | 1.68414E-77      | 0.659673352         |
| COMMD2                      | protein_coding      | 0.754299399        | 9.56009E-88      | 0.657706134         |
| MBNL1                       | protein_coding      | 0.72543237         | 4.17383E-78      | 0.65721275          |
| RSRC1                       | protein_coding      | 0.723014513        | 2.35539E-77      | 0.657010848         |
| FYTTD1                      | protein_coding      | 0.727606686        | 8.66561E-79      | 0.656022358         |
| ATG3                        | protein_coding      | 0.720119121        | 1.82626E-76      | 0.654352824         |
| POGLUT1                     | protein_coding      | 0.701011941        | 7.26358E-71      | 0.653684873         |
| SKIL                        | protein_coding      | 0.679325958        | 5.00144E-65      | 0.651315345         |
| SMC4                        | protein_coding      | 0.699104494        | 2.48722E-70      | 0.650027563         |
| CDV3                        | protein_coding      | 0.684043148        | 2.96851E-66      | 0.649527059         |
| NSUN3                       | protein_coding      | 0.709181273        | 3.33211E-73      | 0.649445058         |
| MRPL3                       | protein_coding      | 0.700510064        | 1.00511E-70      | 0.648330811         |
| XRN1                        | protein_coding      | 0.710267707        | 1.60547E-73      | 0.647459924         |
| ZNF267                      | protein_coding      | 0.673647668        | 1.39746E-63      | 0.64645214          |
| COPB2                       | protein_coding      | 0.719733437        | 2.39442E-76      | 0.643577054         |
| PCNP                        | protein_coding      | 0.711978578        | 5.04933E-74      | 0.643065295         |
| ZBTB38                      | protein_coding      | 0.690246666        | 6.66278E-68      | 0.641416778         |
| IFT57                       | protein_coding      | 0.678044334        | 1.06751E-64      | 0.641270348         |
| Top 50 negative correlation |                     |                    |                  |                     |
| MT-CO3                      | protein_coding      | -0.47468734        | 7.66882E-28      | -0.535968771        |
| MT-CO1                      | protein_coding      | -0.467275484       | 6.38517E-27      | -0.535862422        |

|          |                        |              |             |              |
|----------|------------------------|--------------|-------------|--------------|
| MT-CO2   | protein_coding         | -0.463413149 | 1.88791E-26 | -0.525946284 |
| AGPAT2   | protein_coding         | -0.489282133 | 1.01214E-29 | -0.524308333 |
| MT-ND1   | protein_coding         | -0.470888194 | 2.28736E-27 | -0.496580654 |
| MTCO1P12 | unprocessed_pseudogene | -0.433029919 | 5.98974E-23 | -0.494554749 |
| MT-ATP6  | protein_coding         | -0.422009854 | 9.17585E-22 | -0.474765195 |
| MT-ND4   | protein_coding         | -0.437793391 | 1.78432E-23 | -0.471510654 |
| MT-ND3   | protein_coding         | -0.458969544 | 6.46072E-26 | -0.470042562 |
| MTATP6P1 | unprocessed_pseudogene | -0.381584354 | 8.97534E-18 | -0.469923351 |
| MT-CYB   | protein_coding         | -0.418297813 | 2.24993E-21 | -0.450955069 |
| MT-ND6   | protein_coding         | -0.423654704 | 6.14458E-22 | -0.443322668 |
| GMPR     | protein_coding         | -0.42717949  | 2.5826E-22  | -0.441895002 |
| MT-ND5   | protein_coding         | -0.418753867 | 2.01638E-21 | -0.437519668 |
| C4orf48  | protein_coding         | -0.429169982 | 1.57586E-22 | -0.430598515 |
| MT-RNR1  | Mt_rRNA                | -0.399690235 | 1.7108E-19  | -0.429377459 |
| MT-ATP8  | protein_coding         | -0.406610286 | 3.5269E-20  | -0.422274274 |
| MT-RNR2  | Mt_rRNA                | -0.387640112 | 2.4526E-18  | -0.41966862  |
| TSPAN10  | protein_coding         | -0.417326302 | 2.83999E-21 | -0.419311215 |
| MT-TC    | Mt_tRNA                | -0.442649201 | 5.08996E-24 | -0.413312975 |
| MT-ND4L  | protein_coding         | -0.409607367 | 1.75939E-20 | -0.410878558 |
| MT-ND2   | protein_coding         | -0.390802535 | 1.2323E-18  | -0.407848314 |
| MT-TP    | Mt_tRNA                | -0.39060193  | 1.28758E-18 | -0.402278799 |
| MT-TY    | Mt_tRNA                | -0.415790896 | 4.09737E-21 | -0.398681022 |
| LGI3     | protein_coding         | -0.373791557 | 4.58156E-17 | -0.395956283 |
| DIPK1C   | protein_coding         | -0.364197867 | 3.21142E-16 | -0.39465919  |
| MTCO2P12 | unprocessed_pseudogene | -0.330365213 | 1.86245E-13 | -0.39454269  |
| FNDC10   | protein_coding         | -0.414425212 | 5.66775E-21 | -0.38883685  |
| DPP7     | protein_coding         | -0.395165978 | 4.70928E-19 | -0.388574195 |
| OSGIN1   | protein_coding         | -0.365045958 | 2.71065E-16 | -0.385346414 |
| OCA2     | protein_coding         | -0.420111978 | 1.45346E-21 | -0.382762991 |
| NMRK2    | protein_coding         | -0.294950356 | 6.57745E-11 | -0.37658248  |
| NT5M     | protein_coding         | -0.3787931   | 1.61743E-17 | -0.375905513 |
| BAIAP2   | protein_coding         | -0.339681905 | 3.48552E-14 | -0.371760906 |
| REEP6    | protein_coding         | -0.378664848 | 1.66157E-17 | -0.37066825  |
| SFTPC    | protein_coding         | -0.274015405 | 1.4743E-09  | -0.369830026 |
| G6PC3    | protein_coding         | -0.380325905 | 1.17131E-17 | -0.366047028 |
| ANKRD9   | protein_coding         | -0.369829757 | 1.03199E-16 | -0.362895964 |
| TPRN     | protein_coding         | -0.346032998 | 1.07616E-14 | -0.362778476 |
| H2AJ     | protein_coding         | -0.333179073 | 1.12944E-13 | -0.361549725 |
| MTND1P23 | unprocessed_pseudogene | -0.303104672 | 1.8251E-11  | -0.361046913 |
| DIPK1B   | protein_coding         | -0.369397594 | 1.12681E-16 | -0.359836664 |
| MRPL41   | protein_coding         | -0.362320507 | 4.66548E-16 | -0.358892276 |
| MFSD12   | protein_coding         | -0.350747585 | 4.41996E-15 | -0.35865994  |
| PMEL     | protein_coding         | -0.350992037 | 4.21893E-15 | -0.35765652  |
| MTCO1P40 | processed_pseudogene   | -0.269445075 | 2.80958E-09 | -0.356970996 |
| MTCO2P22 | processed_pseudogene   | -0.313498077 | 3.35737E-12 | -0.356818702 |
| SNTA1    | protein_coding         | -0.345571372 | 1.17319E-14 | -0.352393301 |
| SCARB1   | protein_coding         | -0.316987843 | 1.87316E-12 | -0.348884948 |
| ABCD1    | protein_coding         | -0.363286024 | 3.85134E-16 | -0.347318892 |

Abbreviations: SERP1, Stress associated endoplasmic reticulum protein 1; SKCM, Skin Cutaneous Melanoma.

**Supplementary Table 4. SERP1-interaction proteins, annotation of SERP1-interacting proteins and their co-expression scores.**

| Gene symbol | Annotation                                                                                                                                                                                                                                                                                                                                                                                                                                                                                                                                                                                                     | Co-expression scores |
|-------------|----------------------------------------------------------------------------------------------------------------------------------------------------------------------------------------------------------------------------------------------------------------------------------------------------------------------------------------------------------------------------------------------------------------------------------------------------------------------------------------------------------------------------------------------------------------------------------------------------------------|----------------------|
| SEC61B      | Protein transport protein Sec61 subunit beta; Necessary for protein translocation in the endoplasmic reticulum; Belongs to the SEC61-beta family                                                                                                                                                                                                                                                                                                                                                                                                                                                               | 0.983                |
| SEC61A1     | Protein transport protein Sec61 subunit alpha isoform 1; Plays a crucial role in the insertion of secretory and membrane polypeptides into the ER. Required for assembly of membrane and secretory proteins. Tightly associated with membrane-bound ribosomes, either directly or through adaptor proteins. Plays a role in pronephric kidney tubule development (By similarity); Belongs to the SecY/SEC61-alpha family                                                                                                                                                                                       | 0.974                |
| SEC61G      | Protein transport protein Sec61 subunit gamma; Necessary for protein translocation in the endoplasmic reticulum; Belongs to the SecE/SEC61-gamma family                                                                                                                                                                                                                                                                                                                                                                                                                                                        | 0.959                |
| ASNA1       | ATPase ASNA1; ATPase required for the post-translational delivery of tail-anchored (TA) proteins to the endoplasmic reticulum. Recognizes and selectively binds the transmembrane domain of TA proteins in the cytosol. This complex then targets to the endoplasmic reticulum by membrane-bound receptors, where the tail-anchored protein is released for insertion. This process is regulated by ATP binding and hydrolysis. ATP binding drives the homodimer towards the closed dimer state, facilitating recognition of newly synthesized TA membrane proteins. ATP hydrolysis is required for insertion. | 0.955                |
| SEC62       | Translocation protein SEC62; Required for preprotein translocation                                                                                                                                                                                                                                                                                                                                                                                                                                                                                                                                             | 0.954                |
| SEC61A2     | Protein transport protein Sec61 subunit alpha isoform 2; Appears to play a crucial role in the insertion of secretory and membrane polypeptides into the ER. It is required for assembly of membrane and secretory proteins. Found to be tightly associated with membrane-bound ribosomes, either directly or through adaptor proteins (By similarity); Belongs to the SecY/SEC61-alpha family                                                                                                                                                                                                                 | 0.945                |
| SEC63       | Translocation protein SEC63 homolog; Required for integral membrane and secreted preprotein translocation across the endoplasmic reticulum membrane; DNAJ heat shock proteins                                                                                                                                                                                                                                                                                                                                                                                                                                  | 0.945                |
| SPCS1       | Signal peptidase complex subunit 1; Component of the microsomal signal peptidase complex which removes signal peptides from nascent proteins as they are translocated into the lumen of the endoplasmic reticulum; Belongs to the SPCS1 family                                                                                                                                                                                                                                                                                                                                                                 | 0.676                |
| SEC11C      | Signal peptidase complex catalytic subunit SEC11C; Component of the microsomal signal peptidase complex which removes signal peptides from nascent proteins as they are translocated into the lumen of the endoplasmic reticulum                                                                                                                                                                                                                                                                                                                                                                               | 0.672                |
| DAD1        | Dolichyl-diphosphooligosaccharide--protein glycosyltransferase subunit DAD1; Essential subunit of the N-oligosaccharyl transferase (OST) complex which catalyzes the transfer of a high mannose oligosaccharide from a lipid-linked oligosaccharide donor to an asparagine residue within an Asn-X-Ser/Thr consensus motif in nascent polypeptide chains. Required for the assembly of both SST3A- and SS3B-containing OST complexes. Required for efficient N-glycosylation. Loss of the DAD1 protein triggers apoptosis; Belongs to the DAD/OST2 family                                                      | 0.642                |

Abbreviations: SERP1, Stress associated endoplasmic reticulum protein 1; SKCM, Skin Cutaneous Melanoma.

**Supplementary Table 5. GO analysis and KEGG approach pathway analysis of DEGs between high and low SERP1 in SKCM patients.**

| Ontology | ID         | Description                                      | pvalue   | p.adjust | qvalue   | Count | GeneID                                                                                                                                                                                                                                                                                       |
|----------|------------|--------------------------------------------------|----------|----------|----------|-------|----------------------------------------------------------------------------------------------------------------------------------------------------------------------------------------------------------------------------------------------------------------------------------------------|
| BP       | GO:0030216 | keratinocyte differentiation                     | 2.51E-54 | 1.63E-51 | 1.49E-51 | 43    | CDSN/DSC1/SFN/IVL/KRT1/KRT2/KRT5/KRT6A/KRT6B/KRT14/KRT16/KRT17/PI3/SERPINB13/PKP1/S100A7/SPRR1A/SPRR1B/SPRR2A/SPRR2B/SPRR2E/SPRR2G/FOXN1/KRT75/CASP14/KLK5/LCE2B/CNFN/LCE3D/SPRR4/KRT6C/LCE1A/LCE1B/LCE1C/LCE1D/LCE1F/LCE2C/LCE2D/LCE3A/LCE3C/LCE3E/LCE6A/C1orf68                            |
| BP       | GO:0008544 | epidermis development                            | 7.02E-53 | 2.28E-50 | 2.08E-50 | 47    | CDSN/COL17A1/DSC1/SFN/IVL/KRT1/KRT2/KRT5/KRT6A/KRT6B/KRT14/KRT16/KRT17/PI3/SERPINB13/PKP1/S100A7/SPRR1A/SPRR1B/SPRR2A/SPRR2B/SPRR2E/SPRR2G/FOXN1/KRT75/CASP14/KLK5/LCE2B/CALML5/CNFN/LCE3D/SPRR4/KRT6C/LCE1A/LCE1B/LCE1C/LCE1D/LCE1F/LCE2C/LCE2D/LCE3A/LCE3C/LCE3E/KRTDAP/FLG2/LCE6A/C1orf68 |
| BP       | GO:0031424 | keratinization                                   | 1.09E-52 | 2.37E-50 | 2.16E-50 | 39    | CDSN/DSC1/SFN/IVL/KRT1/KRT2/KRT5/KRT6A/KRT6B/KRT14/KRT16/KRT17/PI3/PKP1/SPRR1A/SPRR1B/SPRR2A/SPRR2B/SPRR2E/SPRR2G/KRT75/CASP14/KLK5/LCE2B/CNFN/LCE3D/SPRR4/KRT6C/LCE1A/LCE1B/LCE1C/LCE1D/LCE1F/LCE2C/LCE2D/LCE3A/LCE3C/LCE3E/LCE6A                                                           |
| CC       | GO:0001533 | cornified envelope                               | 5.83E-53 | 4.20E-51 | 3.81E-51 | 29    | CDSN/DSC1/IVL/KRT1/KRT2/PI3/PKP1/SPRR1A/SPRR1B/SPRR2A/SPRR2B/SPRR2E/SPRR2G/LCE2B/CNFN/LCE3D/SPRR4/LCE1A/LCE1B/LCE1C/LCE1D/LCE1F/LCE2C/LCE2D/LCE3A/LCE3C/LCE3E/FLG2/C1orf68                                                                                                                   |
| CC       | GO:0005882 | intermediate filament                            | 1.70E-10 | 6.13E-09 | 5.56E-09 | 12    | KRT1/KRT2/KRT5/KRT6A/KRT6B/KRT14/KRT16/KRT17/PKP1/KRT75/CASP14/KRT6C                                                                                                                                                                                                                         |
| CC       | GO:0045095 | keratin filament                                 | 3.58E-10 | 8.59E-09 | 7.79E-09 | 9     | KRT1/KRT2/KRT5/KRT6A/KRT6B/KRT14/KRT75/CASP14/KRT6C                                                                                                                                                                                                                                          |
| MF       | GO:0030280 | structural constituent of epidermis              | 2.98E-13 | 3.67E-11 | 3.29E-11 | 7     | KRT1/KRT2/PI3/PKP1/SPRR1A/SPRR2E/FLG2                                                                                                                                                                                                                                                        |
| MF       | GO:0005200 | structural constituent of cytoskeleton           | 3.54E-07 | 2.18E-05 | 1.96E-05 | 7     | KRT2/KRT5/KRT6A/KRT6B/KRT14/KRT16/KRT17                                                                                                                                                                                                                                                      |
| MF       | GO:0004867 | serine-type endopeptidase inhibitor activity     | 6.28E-05 | 0.002573 | 0.002312 | 5     | PI3/SERPINB13/WFDC12/A2ML1/WFDC5                                                                                                                                                                                                                                                             |
| KEGG     | hsa04915   | Estrogen signaling pathway                       | 5.09E-06 | 0.000356 | 0.000123 | 5     | CALML3/KRT14/KRT16/KRT17/CALML5                                                                                                                                                                                                                                                              |
| KEGG     | hsa04912   | GnRH signaling pathway                           | 2.70E-05 | 0.000838 | 0.00029  | 4     | CALML3/CALML5/PLA2G4E/PLA2G4F                                                                                                                                                                                                                                                                |
| KEGG     | hsa04750   | Inflammatory mediator regulation of TRP channels | 3.59E-05 | 0.000838 | 0.00029  | 4     | CALML3/CALML5/PLA2G4E/PLA2G4F                                                                                                                                                                                                                                                                |

Abbreviations: SERP1, Stress associated endoplasmic reticulum protein 1; SKCM, Skin Cutaneous Melanoma; DEGs, differentially expressed genes; GO, Gene Ontology; KEGG, Kyoto Encyclopedia of Genes and Genomes; BP, biological process; MF, molecular function; CC, cellular component.



**Supplementary Table 6. Top 50 enrichment plots of GSEA pathway of DEGs between high and low SERP1 in SKCM patients.**

| ID                                                                                            | pvalue   | p.adjust | qvalues |
|-----------------------------------------------------------------------------------------------|----------|----------|---------|
| REACTOME_GPCR_LIGAND_BINDING                                                                  | 0.001029 | 0.039956 | 0.03215 |
| REACTOME_G_ALPHA_I_SIGNALLING_EVENTS                                                          | 0.001045 | 0.039956 | 0.03215 |
| REACTOME_CLASS_A_1_RHODOPSIN_LIKE_RECEPTORS_                                                  | 0.00105  | 0.039956 | 0.03215 |
| REACTOME_LEISHMANIA_INFECTION                                                                 | 0.001062 | 0.039956 | 0.03215 |
| NABA_CORE_MATRISOME                                                                           | 0.001078 | 0.039956 | 0.03215 |
| KEGG_NEUROACTIVE_LIGAND_RECEPTOR_INTERACTION                                                  | 0.001079 | 0.039956 | 0.03215 |
| KEGG_CYTOKINE_CYTOKINE_RECEPTOR_INTERACTION                                                   | 0.00108  | 0.039956 | 0.03215 |
| WP_GPCRS_CLASS_A_RHODOPSINLIKE                                                                | 0.001088 | 0.039956 | 0.03215 |
| REACTOME_ANTI_INFLAMMATORY_RESPONSE_FAVOURING_LEISHMANIA_PARASITE_INFECTI<br>ON               | 0.001094 | 0.039956 | 0.03215 |
| REACTOME_G_ALPHA_Q_SIGNALLING_EVENTS                                                          | 0.001104 | 0.039956 | 0.03215 |
| KEGG_CHEMOKINE_SIGNALING_PATHWAY                                                              | 0.001112 | 0.039956 | 0.03215 |
| REACTOME_PEPTIDE_LIGAND_BINDING_RECEPTORS                                                     | 0.001112 | 0.039956 | 0.03215 |
| REACTOME_CELL_SURFACE_INTERACTIONS_AT_THE_VASCULAR_WALL                                       | 0.001115 | 0.039956 | 0.03215 |
| REACTOME_FC_EPSILON_RECEPTOR_FCERI_SIGNALING                                                  | 0.001119 | 0.039956 | 0.03215 |
| REACTOME_IMMUNOREGULATORY_INTERACTIONS_BETWEEN_A_LYMPHOID_AND_A_NON_                          | 0.001119 | 0.039956 | 0.03215 |
| LYMPHOID_CELL                                                                                 |          |          |         |
| REACTOME_FCGAMMA_RECEPTOR_FCGR_DEPENDENT_PHAGOCYTOSIS                                         | 0.001153 | 0.039956 | 0.03215 |
| REACTOME_SIGNALING_BY_THE_B_CELL_RECEPTOR_BCR_                                                | 0.001153 | 0.039956 | 0.03215 |
| WP_CHEMOKINE_SIGNALING_PATHWAY                                                                | 0.001156 | 0.039956 | 0.03215 |
| KEGG_JAK_STAT_SIGNALING_PATHWAY                                                               | 0.001157 | 0.039956 | 0.03215 |
| REACTOME_FCERI_MEDIATED_NF_KB_ACTIVATION                                                      | 0.001164 | 0.039956 | 0.03215 |
| KEGG_CELL_ADHESION_MOLECULES_CAMS                                                             | 0.001167 | 0.039956 | 0.03215 |
| REACTOME_COMPLEMENT_CASCADE                                                                   | 0.001192 | 0.039956 | 0.03215 |
| REACTOME_PARASITE_INFECTION                                                                   | 0.001198 | 0.039956 | 0.03215 |
| REACTOME_BINDING_AND_UPTAKE_OF_LIGANDS_BY_SCAVENGER_RECEPTORS                                 | 0.001229 | 0.039956 | 0.03215 |
| WP_HUMAN_COMPLEMENT_SYSTEM                                                                    | 0.00123  | 0.039956 | 0.03215 |
| REACTOME_FCERI_MEDIATED_MAPK_ACTIVATION                                                       | 0.001232 | 0.039956 | 0.03215 |
| REACTOME_FCGR3A_MEDIATED_IL10_SYNTHESIS                                                       | 0.001236 | 0.039956 | 0.03215 |
| REACTOME_ANTIGEN_ACTIVATES_B_CELL_RECEPTOR_BCR_LEADING_TO_GENERATION_O<br>F_SECOND_MESSENGERS | 0.001239 | 0.039956 | 0.03215 |
| REACTOME_FCERI_MEDIATED_CA_2_MOBILIZATION                                                     | 0.001239 | 0.039956 | 0.03215 |
| REACTOME_INITIAL_TRIGGERING_OF_COMPLEMENT                                                     | 0.001241 | 0.039956 | 0.03215 |
| WP_ALLOGRAFT_REJECTION                                                                        | 0.001241 | 0.039956 | 0.03215 |
| REACTOME_ROLE_OF_PHOSPHOLIPIDS_IN_PHAGOCYTOSIS                                                | 0.001247 | 0.039956 | 0.03215 |
| WP_TCELL_ANTIGEN_RECEPTOR_TCR_SIGNALING_PATHWAY                                               | 0.001248 | 0.039956 | 0.03215 |
| KEGG_HEMATOPOIETIC_CELL_LINEAGE                                                               | 0.001255 | 0.039956 | 0.03215 |
| WP_PEPTIDE_GPCRS                                                                              | 0.001255 | 0.039956 | 0.03215 |
| KEGG_LEISHMANIA_INFECTION                                                                     | 0.001272 | 0.039956 | 0.03215 |
| REACTOME_CREATION_OF_C4_AND_C2_ACTIVATORS                                                     | 0.001277 | 0.039956 | 0.03215 |
| REACTOME_ROLE_OF_LAT2_NTAL_LAB_ON_CALCIIUM_MOBILIZATION                                       | 0.001277 | 0.039956 | 0.03215 |
| REACTOME_FCGR_ACTIVATION                                                                      | 0.001284 | 0.039956 | 0.03215 |
| REACTOME_SCAVENGING_OF_HEME_FROM_PLASMA                                                       | 0.001284 | 0.039956 | 0.03215 |
| PID_IL12_2PATHWAY                                                                             | 0.001321 | 0.039956 | 0.03215 |
| WP_TCELL_ANTIGEN_RECEPTOR_TCR_PATHWAY_DURING_STAPHYLOCOCCUS_AUREUS_IN<br>FECTION              | 0.001321 | 0.039956 | 0.03215 |
| REACTOME_CD22_MEDIATED_BCR_REGULATION                                                         | 0.001325 | 0.039956 | 0.03215 |
| PID_TCR_PATHWAY                                                                               | 0.001328 | 0.039956 | 0.03215 |
| PID_CD8_TCR_PATHWAY                                                                           | 0.001346 | 0.039956 | 0.03215 |
| REACTOME_INTERLEUKIN_10_SIGNALING                                                             | 0.001346 | 0.039956 | 0.03215 |
| KEGG_INTESTINAL_IMMUNE_NETWORK_FOR_IGA_PRODUCTION                                             | 0.001353 | 0.039956 | 0.03215 |
| REACTOME_CHEMOKINE_RECEPTORS_BIND_CHEMOKINES                                                  | 0.001353 | 0.039956 | 0.03215 |
| REACTOME_INTERLEUKIN_2_FAMILY_SIGNALING                                                       | 0.001366 | 0.039956 | 0.03215 |
| PID_IL12_STAT4_PATHWAY                                                                        | 0.001403 | 0.039956 | 0.03215 |

Abbreviations: SERP1, Stress associated endoplasmic reticulum protein 1; SKCM, Skin Cutaneous Melanoma; DEGs, differentially expressed genes; GSEA, Gene set enrichment analyses.

**Supplementary Table 7. Univariate and multivariate Cox regression analysis for clinical variables associated with OS in SKCM patients.**

| Characteristics                                                       | Total(N) | Univariate analysis   |                  | Multivariate analysis |                  |
|-----------------------------------------------------------------------|----------|-----------------------|------------------|-----------------------|------------------|
|                                                                       |          | Hazard ratio (95% CI) | P value          | Hazard ratio (95% CI) | P value          |
| SERP1 (High vs. Low)                                                  | 456      | 0.625 (0.476-0.820)   | <b>&lt;0.001</b> | 0.591 (0.405-0.861)   | <b>0.006</b>     |
| T stage (T3&T4&T2 vs. T1)                                             | 361      | 2.255 (1.303-3.903)   | <b>0.004</b>     |                       |                  |
| N stage (N1&N2&N3 vs. N0)                                             | 402      | 1.752 (1.304-2.354)   | <b>&lt;0.001</b> | 2.945 (1.887-4.597)   | <b>&lt;0.001</b> |
| M stage (M1 vs. M0)                                                   | 430      | 1.897 (1.029-3.496)   | <b>0.040</b>     |                       |                  |
| Gender (Male vs. Female)                                              | 456      | 1.172 (0.879-1.563)   | 0.281            |                       |                  |
| Age (>60 vs. ≤60)                                                     | 456      | 1.656 (1.251-2.192)   | <b>&lt;0.001</b> | 1.204 (0.828-1.750)   | 0.331            |
| Race (White vs. Asian&Black or African American)                      | 446      | 0.226 (0.104-0.489)   | <b>&lt;0.001</b> | 0.445 (0.170-1.160)   | 0.098            |
| Radiation therapy (Yes vs. No)                                        | 450      | 0.977 (0.694-1.377)   | 0.895            |                       |                  |
| Melanoma ulceration (Yes vs. No)                                      | 313      | 2.085 (1.495-2.907)   | <b>&lt;0.001</b> | 1.645 (1.062-2.546)   | <b>0.026</b>     |
| Breslow depth (>3 vs. ≤3)                                             | 355      | 2.651 (1.938-3.627)   | <b>&lt;0.001</b> | 2.028 (1.312-3.136)   | <b>0.001</b>     |
| Pathologic stage (Stage II&Stage III&Stage IV vs. Stage I)            | 410      | 1.846 (1.292-2.638)   | <b>&lt;0.001</b> | 0.563 (0.303-1.046)   | 0.069            |
| BMI (>25 vs. ≤25)                                                     | 241      | 0.827 (0.513-1.333)   | 0.436            |                       |                  |
| Tumor tissue site (Extremities&Head and Neck&Other Specify vs. Trunk) | 405      | 1.147 (0.859-1.532)   | 0.353            |                       |                  |
| Melanoma Clark level (III&IV&V vs. I&II)                              | 315      | 2.689 (1.188-6.088)   | <b>0.018</b>     |                       |                  |

Abbreviations: SERP1, Stress associated endoplasmic reticulum protein 1; SKCM, Skin Cutaneous Melanoma; OS, overall survival; CI, confidence interval. Bold values indicate P < 0.05.



**Supplementary Table 8. Univariate and multivariate Cox regression analysis for clinical variables associated with DSS in SKCM patients.**

| Characteristics                                                       | Total(N) | Univariate analysis   |                  | Multivariate analysis |                  |
|-----------------------------------------------------------------------|----------|-----------------------|------------------|-----------------------|------------------|
|                                                                       |          | Hazard ratio (95% CI) | P value          | Hazard ratio (95% CI) | P value          |
| T stage (T3&T4&T2 vs. T1)                                             | 356      | 2.026 (1.166-3.518)   | <b>0.012</b>     |                       |                  |
| N stage (N1&N2&N3 vs. N0)                                             | 396      | 1.665 (1.214-2.283)   | <b>0.002</b>     | 2.893 (1.813-4.616)   | <b>&lt;0.001</b> |
| M stage (M1 vs. M0)                                                   | 424      | 2.200 (1.190-4.069)   | <b>0.012</b>     |                       |                  |
| Gender (Male vs. Female)                                              | 450      | 1.161 (0.855-1.575)   | 0.340            |                       |                  |
| Age (>60 vs. ≤60)                                                     | 450      | 1.699 (1.258-2.294)   | <b>&lt;0.001</b> | 1.184 (0.799-1.756)   | 0.400            |
| Race (White vs. Asian&Black or African American)                      | 440      | 0.464 (0.146-1.474)   | 0.193            |                       |                  |
| Radiation therapy (Yes vs. No)                                        | 444      | 0.994 (0.689-1.433)   | 0.973            |                       |                  |
| Melanoma ulceration (Yes vs. No)                                      | 309      | 1.948 (1.372-2.767)   | <b>&lt;0.001</b> | 1.709 (1.087-2.687)   | <b>0.020</b>     |
| Breslow depth (>3 vs. ≤3)                                             | 350      | 2.274 (1.628-3.177)   | <b>&lt;0.001</b> | 1.719 (1.096-2.695)   | <b>0.018</b>     |
| SERP1 (High vs. Low)                                                  | 450      | 0.655 (0.490-0.874)   | <b>0.004</b>     | 0.584 (0.395-0.864)   | <b>0.007</b>     |
| Pathologic stage (Stage II&Stage III&Stage IV vs. Stage I)            | 405      | 1.711 (1.181-2.478)   | <b>0.004</b>     | 0.586 (0.309-1.109)   | 0.101            |
| Tumor tissue site (Extremities&Head and Neck&Other Specify vs. Trunk) | 399      | 1.183 (0.868-1.611)   | 0.288            |                       |                  |
| BMI (>25 vs. ≤25)                                                     | 238      | 0.937 (0.545-1.612)   | 0.815            |                       |                  |
| Melanoma Clark level (III&IV&V vs. I&II)                              | 310      | 2.949 (1.207-7.209)   | <b>0.018</b>     |                       |                  |

Abbreviations: SERP1, Stress associated endoplasmic reticulum protein 1; SKCM, Skin Cutaneous Melanoma; DSS, disease specific survival; CI, confidence interval. Bold values indicate P<0.05.

**Supplementary Table 9. Univariate and multivariate Cox regression analysis for clinical variables associated with PFI in SKCM patients.**

| Characteristics                                            | Total(N) | Univariate analysis   |                | Multivariate analysis |                |
|------------------------------------------------------------|----------|-----------------------|----------------|-----------------------|----------------|
|                                                            |          | Hazard ratio (95% CI) | P value        | Hazard ratio (95% CI) | P value        |
| T stage (T3&T4 vs. T1&T2)                                  | 362      | 1.664 (1.268-2.183)   | < <b>0.001</b> | 1.489 (0.795-2.789)   | 0.214          |
| N stage (N1&N2&N3 vs. N0)                                  | 403      | 1.870 (1.467-2.385)   | < <b>0.001</b> | 2.925 (1.975-4.334)   | < <b>0.001</b> |
| M stage (M1 vs. M0)                                        | 431      | 2.026 (1.255-3.269)   | <b>0.004</b>   | 1.519 (0.686-3.364)   | 0.302          |
| Pathologic stage (Stage II&Stage III&Stage IV vs. Stage I) | 411      | 1.739 (1.293-2.340)   | < <b>0.001</b> | 0.405 (0.195-0.839)   | <b>0.015</b>   |
| Radiation therapy (Yes vs. No)                             | 451      | 1.214 (0.917-1.606)   | 0.175          |                       |                |
| Gender (Male vs. Female)                                   | 457      | 1.037 (0.821-1.309)   | 0.763          |                       |                |
| Race (White vs. Asian&Black or African American)           | 447      | 0.965 (0.358-2.605)   | 0.945          |                       |                |
| Age (>60 vs. <=60)                                         | 457      | 1.576 (1.240-2.002)   | < <b>0.001</b> | 1.362 (0.971-1.911)   | 0.074          |
| Melanoma ulceration (Yes vs. No)                           | 313      | 1.626 (1.228-2.152)   | < <b>0.001</b> | 1.536 (1.040-2.267)   | <b>0.031</b>   |
| Melanoma Clark level (III&IV&V vs. I&II)                   | 315      | 1.864 (1.039-3.346)   | <b>0.037</b>   | 1.122 (0.551-2.288)   | 0.751          |
| BMI (>25 vs. <=25)                                         | 241      | 0.966 (0.660-1.416)   | 0.861          |                       |                |
| Breslow depth (>3 vs. <=3)                                 | 355      | 2.032 (1.547-2.669)   | < <b>0.001</b> | 1.557 (1.003-2.417)   | <b>0.048</b>   |
| SERP1 (High vs. Low)                                       | 457      | 0.768 (0.612-0.964)   | <b>0.023</b>   | 0.769 (0.555-1.067)   | 0.116          |

Abbreviations: SERP1, Stress associated endoplasmic reticulum protein 1; SKCM, Skin Cutaneous Melanoma; PFI, progress free interval; CI, confidence interval. Bold values indicate P<0.05.

**Supplementary Table 10. Details of the ROC information.**

| Time   | Cut-off  | Sensitivity | Specificity | Positive predictive value | Negative predictive value |
|--------|----------|-------------|-------------|---------------------------|---------------------------|
| OS     |          |             |             |                           |                           |
| 1 year | 6.255538 | 0.179       | 0.628       | 0.0322                    | 0.917                     |
| 3 year | 5.896933 | 0.516       | 0.295       | 0.231                     | 0.598                     |
| 5 year | 6.190405 | 0.302       | 0.523       | 0.308                     | 0.515                     |
| DSS    |          |             |             |                           |                           |
| 1 year | 6.500816 | 0.0459      | 0.789       | 0.0117                    | 0.938                     |
| 3 year | 5.903546 | 0.527       | 0.299       | 0.208                     | 0.644                     |
| 5 year | 6.190405 | 0.308       | 0.52        | 0.287                     | 0.545                     |

Abbreviations: overall survival: OS; disease specific survival: DSS
